# Supplementary material for: Characterizing Key Volatile Pollutants Emitted from Adhesives by Chemical Compositions, Odor Contributions and Health Risks
Source: MDPI journal article supplement (doi:10.3390/molecules27031125), 2022-02-08

## *Supplementary Information*

### **Characterizing key volatile pollutants emitted from adhesives by chemical compositions, odor contributions and health risks**

Zixuan Zhao<sup>1,2</sup>, Yipu Pei<sup>3</sup>, Peng Zhao<sup>d</sup>, Chuandong Wu<sup>1</sup>, Chen Qu<sup>1</sup>, Weifang Li<sup>2</sup>, Yanjun Zhao<sup>1</sup>, Jiemin Liu<sup>1,\*</sup>

<sup>1</sup> School of Chemistry and Biological Engineering, University of Science and Technology Beijing, Beijing, 100083, China; [zzxmht@163.com](mailto:zzxmht@163.com) (Z.Z.); [wuchuandong@ustb.edu.cn](mailto:wuchuandong@ustb.edu.cn) (C.W.); [quchen5626@163.com](mailto:quchen5626@163.com) (C.Q.); [zhaoyj@ustb.edu.cn](mailto:zhaoyj@ustb.edu.cn) (Y.Z.); [liujm@ustb.edu.cn](mailto:liujm@ustb.edu.cn) (J.L.)

<sup>2</sup> State Environmental Protection Key Laboratory of Odor Pollution Control, Tianjin Academy of Eco-environmental Sciences, Tianjin, 300191, China; [zzxmht@163.com](mailto:zzxmht@163.com) (Z.Z.); [lfw1919@163.com](mailto:lfw1919@163.com) (W.L.)

<sup>3</sup> China Building Material Test & Certification Group Co., Ltd, Beijing, 100024, China; [peiyipu@ctc.ac.cn](mailto:peiyipu@ctc.ac.cn) (Y.P.)

<sup>4</sup> Beijing Municipal Institute of Labor Protection, Beijing 100054, China; [zhaopeng@bmilp.com](mailto:zhaopeng@bmilp.com) (P.Z.)

\* Correspondence: [liujm@ustb.edu.cn](mailto:liujm@ustb.edu.cn) (J.L.); Tel.: (+86)-10-8237-6678; fax: (+86)-10-6233-2281

**Figure S1. Structure and components of the sealed gas emission chamber.**

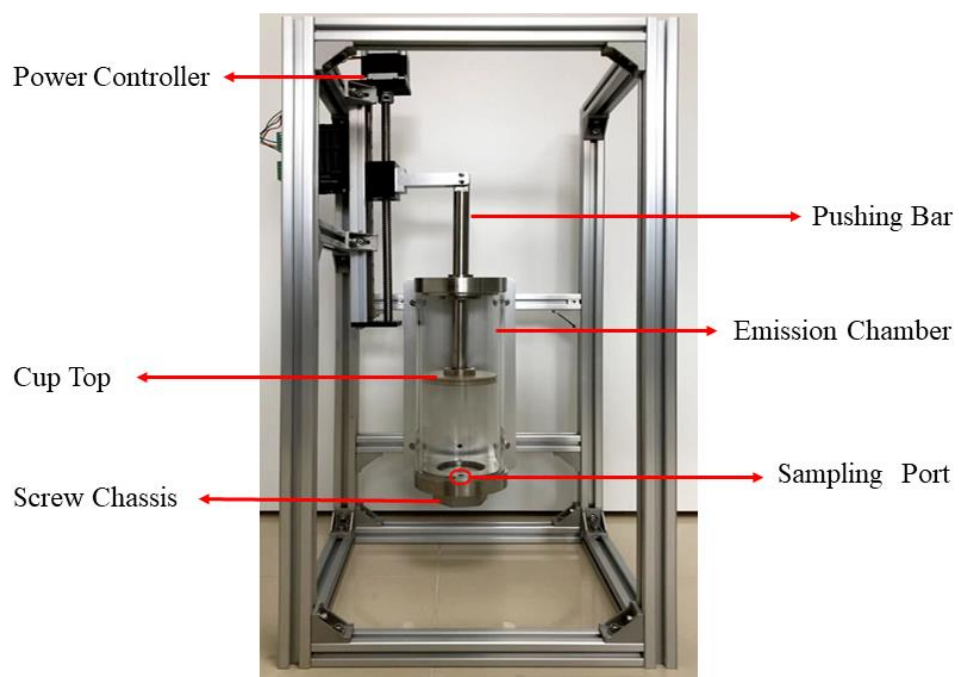

**Table S1. Odor activity values (OAVs) of volatile compounds emitted from white emulsion adhesive.**

|             | Xylene | Ethylbenzene | 4-methyl-2-pentone | Ethyl acetate | Methyl acetate | Trichloromethane | Benzene | Butanone | Cyclohexane | tert-Butanol | Dibutyl ether |
|-------------|--------|--------------|--------------------|---------------|----------------|------------------|---------|----------|-------------|--------------|---------------|
| <b>S-1</b>  | 66.09  | 4.91         | 37.74              |               |                |                  |         |          |             |              |               |
| <b>S-2</b>  | 10.94  |              | 4.47               |               | 2.03           |                  |         |          |             |              |               |
| <b>S-3</b>  | 185.28 | 18.86        | 79.06              |               |                |                  |         |          |             | 0.33         | 30.01         |
| <b>S-4</b>  | 49.25  | 3.19         | 23.01              |               | 3.63           |                  |         |          |             |              | 53.12         |
| <b>S-5</b>  | 1.12   |              | 1.16               | 9.72          |                |                  |         |          | 4.17        |              |               |
| <b>S-6</b>  | 59.22  | 14.82        | 0.43               | 1.83          | 0.68           |                  |         |          |             |              |               |
| <b>S-7</b>  | 35.84  | 13.63        | 0.36               | 13.10         | 0.71           | 1.39             | 3.50    |          |             |              |               |
| <b>S-8</b>  | 45.05  | 22.96        | 0.55               |               | 2.70           | 0.95             | 0.52    |          | 0.029       |              |               |
| <b>S-9</b>  | 85.08  | 20.14        | 0.42               | 4.32          | 0.18           |                  | 0.56    | 1.85     | 0.014       |              |               |
| <b>S-10</b> | 90.09  |              | 0.75               | 5.66          | 0.178          |                  | 0.35    | 2.54     | 0.024       |              | 4.64          |

**Table S2. Odor activity values (OAVs) of volatile compounds emitted from silicone adhesive.**

|             | Butanone oxime | Butanone | Ethanol | 4-methyl-2-pentone | Ethylbenzene | Xylene | Butyl acetate | Ethyl acetoacetate | Methyl acetoacetate | N, N-dimethylformamide | Isopropanol | Butanol | Acetone | Cyclohexane |
|-------------|----------------|----------|---------|--------------------|--------------|--------|---------------|--------------------|---------------------|------------------------|-------------|---------|---------|-------------|
| <b>W-1</b>  | 3206.54        | 54.60    |         |                    |              |        |               |                    |                     |                        |             |         |         | 1.85        |
| <b>W-2</b>  | 53.08          |          |         |                    | 0.25         |        | 92.66         |                    |                     |                        |             | 424.72  | 0.34    |             |
| <b>W-3</b>  | 3934.30        | 83.70    | 175.38  |                    |              |        |               |                    |                     |                        |             |         |         |             |
| <b>W-4</b>  | 2806.39        | 52.26    | 294.51  | 4.59               |              | 4.02   |               |                    |                     |                        |             |         |         |             |
| <b>W-5</b>  | 124.32         |          | 905.87  |                    |              |        |               |                    |                     | 2.39                   |             |         |         |             |
| <b>W-6</b>  | 1069.75        | 4.48     | 121.27  |                    |              |        |               |                    |                     |                        |             |         |         | 0.07        |
| <b>W-7</b>  | 3154.77        | 47.09    | 66.32   |                    |              | 0.44   |               |                    |                     |                        |             |         |         |             |
| <b>W-8</b>  | 347.87         |          |         |                    |              |        |               | 1653.41            | 5806.51             |                        | 1.97        |         |         |             |
| <b>W-9</b>  | 5289.86        | 38.23    |         | 10.51              |              | 8.73   |               |                    |                     |                        |             |         |         |             |
| <b>W-10</b> | 3298.17        | 22.66    | 1143.79 | 14.68              |              | 14.75  |               |                    |                     |                        |             |         |         |             |
| <b>W-11</b> | 895.44         | 4.48     | 93.48   |                    |              |        |               |                    |                     |                        |             |         |         |             |
| <b>W-12</b> | 1575.72        | 4.37     | 96.58   |                    |              |        |               |                    |                     |                        |             |         |         |             |
| <b>W-13</b> | 719.55         | 4.39     | 2.62    |                    |              |        |               |                    |                     |                        |             |         |         |             |
| <b>W-14</b> | 69.51          |          |         |                    |              |        |               |                    |                     |                        |             | 55.39   |         |             |
| <b>W-15</b> | 113.19         |          | 102.80  |                    |              |        |               |                    |                     |                        |             |         |         |             |
| <b>W-16</b> | 1121.43        | 4.53     | 25.58   |                    |              |        |               |                    |                     |                        |             |         |         |             |
| <b>W-17</b> | 1219.32        | 3.18     | 22.38   |                    |              |        |               |                    |                     |                        |             |         |         |             |
| <b>W-18</b> | 1543.74        | 7.72     | 73.65   |                    |              |        |               |                    |                     |                        |             |         |         |             |
| <b>W-19</b> | 1184.85        |          | 142.79  |                    |              |        |               |                    |                     |                        |             |         |         |             |

W-20 98.04

0.47

0.27

---

**Figure S2. Proportions of the cancer risks of volatile compounds emitted from white emulsion adhesives.**

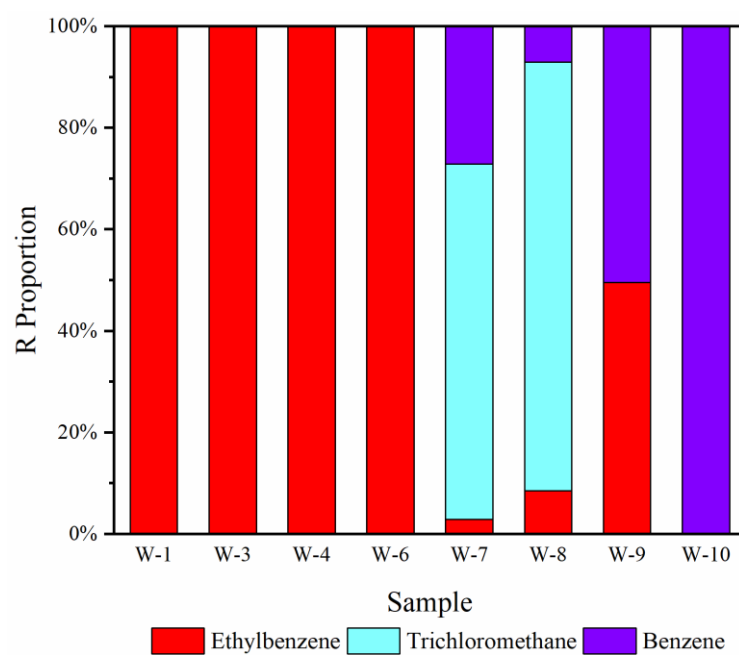

Supplement: s1 [file s1]
